# Supplementary material for: The role and mechanism of cinnamaldehyde in cancer
Source: PubMed Central journal article supplement — J Food Drug Anal. 2024 Jun 15;32(2):140–54. doi: 10.38212/2224-6614.3502 (PMC11210466; doi:10.38212/2224-6614.3502), 2024-06-15
Supplement: jfda-32-02-140-s001.pdf [file jfda-32-02-140-s001.pdf]

---

## *Research Highlights*

---

- Revealing Cinnamaldehyde's Role in Cancer
- Unraveling the Mechanism of Cinnamaldehyde in Cancer
- Exploring Cinnamaldehyde's Therapeutic Potential
